# Supplementary material
Source: HighWire-hosted journal article supplement (https://emj.bmj.com/content/37/4/229)
Supplement: inline-supplementary-material-1 [file inline-supplementary-material-1.pdf]

## Appendix 1: Request sent to acute hospital Trusts

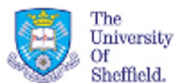

---

### Freedom of Information request

---

To: [foi@xxx.nhs.uk](mailto:foi@xxx.nhs.uk)

Dear Sir/Madam,

I am requesting information on following questions related to acute myocardial infarction (AMI) under the Freedom of Information Act 2000.

1. Do the hospitals within your Trust use High Sensitivity Troponin Assay to diagnose patients who present with suspected acute myocardial infarction (AMI)?
2. If yes, in which year was the High Sensitivity Troponin Assay introduced for this purpose?
3. What assay is it (please specify manufacturer) and what threshold is used for a positive test?
4. Is it used for rapid rule-out of AMI to avoid hospital admission?
5. Please send a copy of any guidelines or protocol used by your Trust for the diagnosis of AMI by email.

I look forward to your reply.

Yours faithfully,
